# Supplementary material
Source: Springer Nature journal article supplement (https://www.springermedizin.de/resource/supplementary/12986_2013_588_MOESM3_ESM.pdf/25655086)

**A**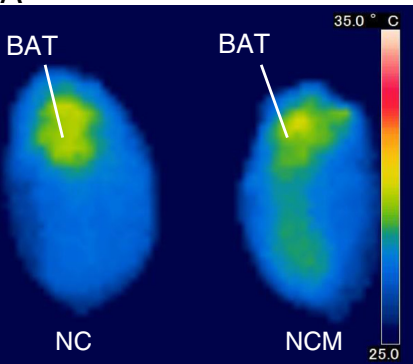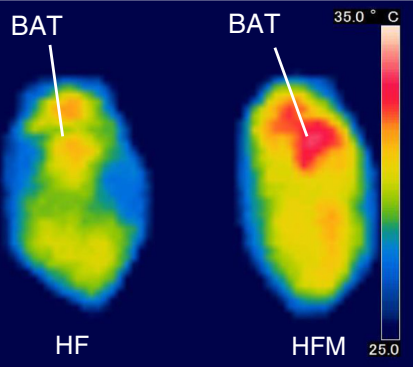**B**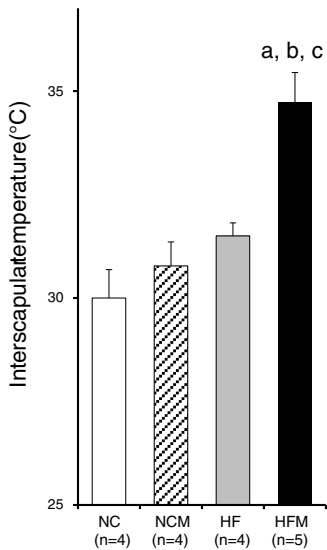

Supplement: MOESM3 [file 25655086]
